# Supplementary material for: mTOR coordinates transcriptional programs and mitochondrial metabolism of activated Treg subsets to protect tissue homeostasis
Source: PubMed Central journal article supplement (PMC5974344; doi:10.1038/s41467-018-04392-5), 2018-05-29
Supplement: 41467_2018_4392_MOESM1_ESM.pdf [file 41467_2018_4392_MOESM1_ESM.pdf]

**SUPPLEMENTARY INFORMATION**

**mTOR coordinates transcriptional programs and mitochondrial metabolism of activated T<sub>reg</sub> subsets to protect tissue homeostasis**

**Chapman *et al.***

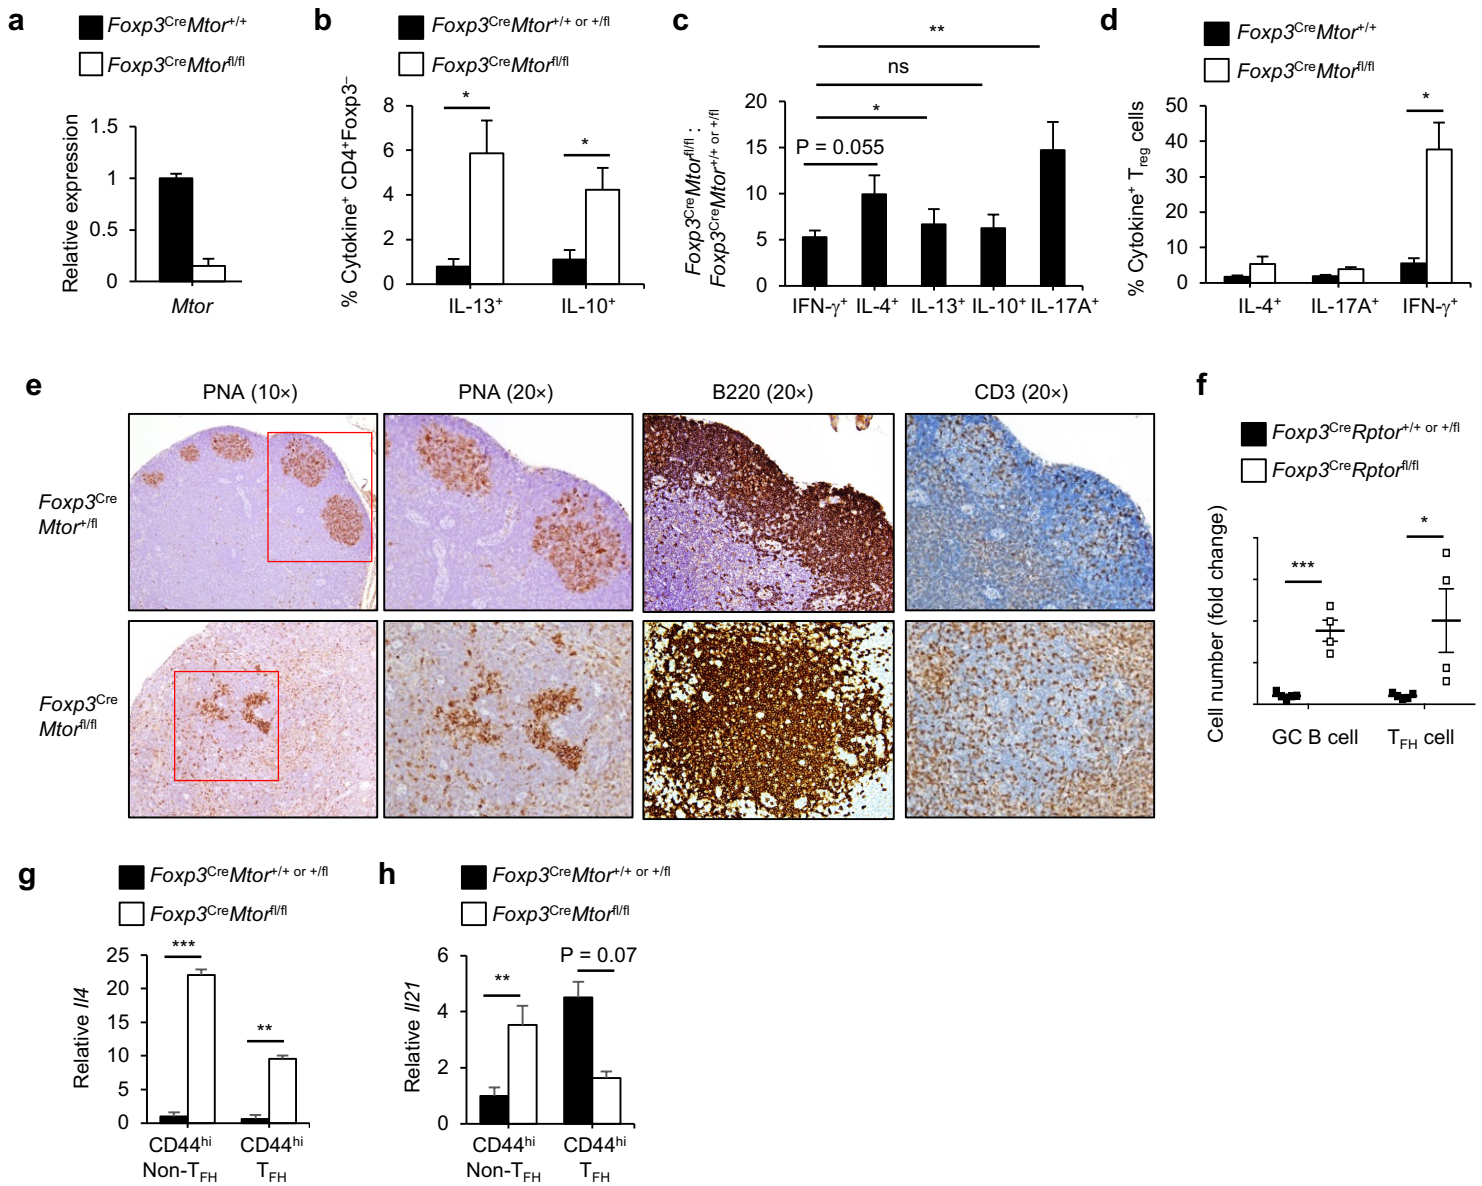

**Supplementary Fig. 1.** *Foxp3<sup>Cre</sup>*-mediated deletion of *Mtor* in T<sub>reg</sub> cells leads to altered cytokine production and GC responses. **a** Deletion efficiency of *Mtor* in T<sub>reg</sub> cells as assessed by qPCR. **b** Quantification of IL-13- and IL-10-producing CD4<sup>+</sup>Foxp3<sup>-</sup> T cells in *Foxp3<sup>Cre</sup>Mtor<sup>+/+</sup> or +/fl* or *Foxp3<sup>Cre</sup>Mtor<sup>fl/fl</sup>* mice. **c** Quantification of the fold change of IFN- $\gamma$ -, IL-4-, IL-13-, IL-10-, and IL-17A-producing CD4<sup>+</sup>Foxp3<sup>-</sup> T cells in the spleen of *Foxp3<sup>Cre</sup>Mtor<sup>fl/fl</sup>* mice compared to *Foxp3<sup>Cre</sup>Mtor<sup>+/+</sup> or +/fl* mice. **d** Quantification of IL-4-, IL-17A-, and IFN- $\gamma$ -producing CD4<sup>+</sup>Foxp3<sup>+</sup> T<sub>reg</sub> cells in *Foxp3<sup>Cre</sup>Mtor<sup>+/+</sup> or +/fl* and *Foxp3<sup>Cre</sup>Mtor<sup>fl/fl</sup>* mice. **e** Representative immunohistochemistry of PNA<sup>+</sup> cells, B220<sup>+</sup> B cells, and CD3<sup>+</sup> T cells in the mesenteric lymph nodes of *Foxp3<sup>Cre</sup>Mtor<sup>+/+</sup> or +/fl* and *Foxp3<sup>Cre</sup>Mtor<sup>fl/fl</sup>* mice. The boxed regions in PNA (10 $\times$ ) are shown at higher power in PNA (20 $\times$ ). **f** Quantification of the fold change of GC B cells and T<sub>FH</sub> cells in the spleen of *Foxp3<sup>Cre</sup>Rptor<sup>+/+</sup> or +/fl* and *Foxp3<sup>Cre</sup>Rptor<sup>fl/fl</sup>* mice. **g, h** Analysis of *Il4* (**g**) and *Il21* (**h**) expression in CD4<sup>+</sup>Foxp3-YFP-CD44<sup>hi</sup>CXCR5-PD-1<sup>-</sup> non-T<sub>FH</sub> cells and CD4<sup>+</sup>Foxp3-YFP-CD44<sup>hi</sup>CXCR5<sup>+</sup>PD-1<sup>+</sup> T<sub>FH</sub> cells isolated from the spleen of *Foxp3<sup>Cre</sup>Mtor<sup>+/+</sup> or +/fl* or *Foxp3<sup>Cre</sup>Mtor<sup>fl/fl</sup>* mice. Error bars show mean  $\pm$  s.e.m. \**P* < 0.05; \*\**P* < 0.01; \*\*\**P* < 0.001; ns, not significant; unpaired, two-tailed Student's *t*-test. Data are representative of three biological replicates (e) or are quantified from four (a), five (b, c, IL-10<sup>+</sup> cells), or six or eight (b, c, IL-13<sup>+</sup> cells in *Foxp3<sup>Cre</sup>Mtor<sup>+/+</sup> or +/fl* or *Foxp3<sup>Cre</sup>Mtor<sup>fl/fl</sup>* mice, respectively), five (d, f), or three (g, h) biological replicates, compiled from two (a, f), five (b, IL-10<sup>+</sup> cells; d), six (b, IL-13<sup>+</sup> cells), twelve (c, IL-17A<sup>+</sup> cells), fourteen (c, IFN- $\gamma$ <sup>+</sup> and IL-4<sup>+</sup> cells), or one (g, h) independent experiments.

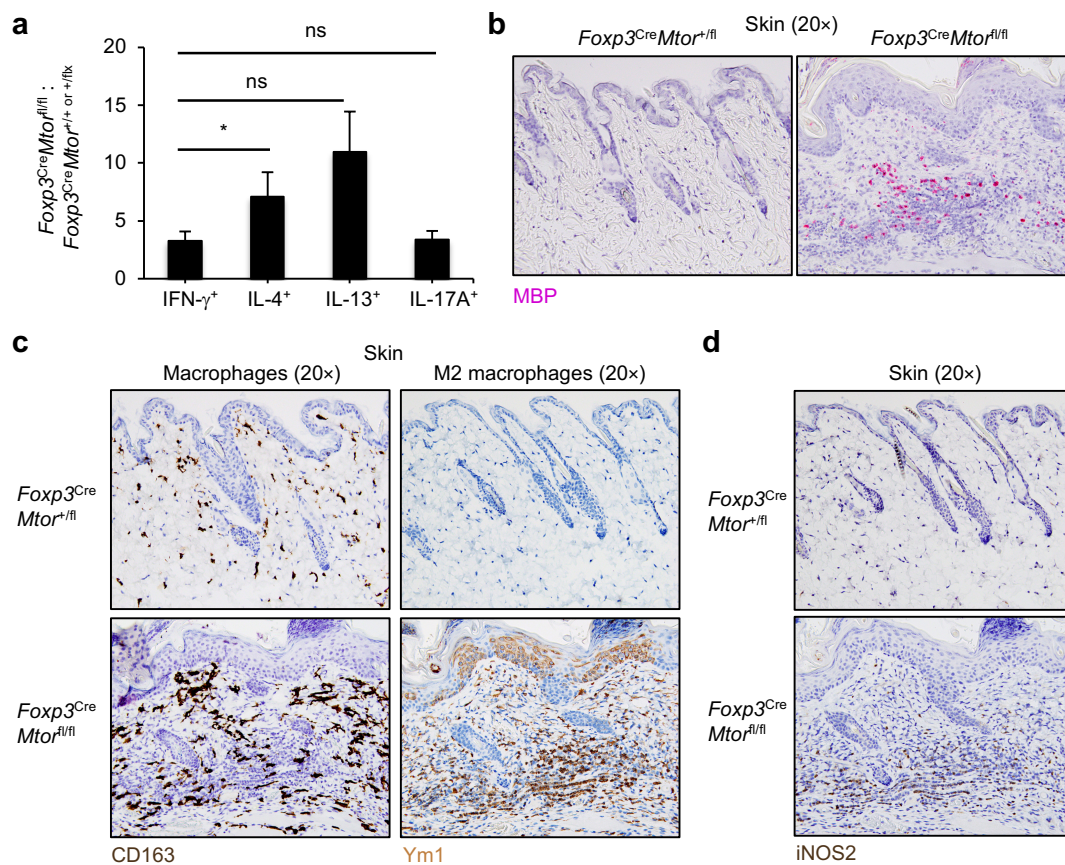

**Supplementary Fig. 2.** T<sub>H</sub>2 responses are elevated in the lung and skin of *Foxp3<sup>Cre</sup>Mtor<sup>fl/fl</sup>* mice.

**a** Quantification of the fold change of IFN- $\gamma$ -, IL-4-, IL-13-, and IL-17A-producing CD4<sup>+</sup>Foxp3<sup>-</sup> T cells in the lung of *Foxp3<sup>Cre</sup>Mtor<sup>fl/fl</sup>* mice compared to *Foxp3<sup>Cre</sup>Mtor<sup>+/+</sup>* or *+/fl* mice. **b** Representative images of major basic protein (MBP) staining for eosinophils in the skin of *Foxp3<sup>Cre</sup>Mtor<sup>+fl</sup>* and *Foxp3<sup>Cre</sup>Mtor<sup>fl/fl</sup>* mice. **c** Representative images for M2 macrophages in the skin of *Foxp3<sup>Cre</sup>Mtor<sup>+fl</sup>* or *Foxp3<sup>Cre</sup>Mtor<sup>fl/fl</sup>* mice by CD163 and Ym1 staining. **d** Representative images for neutrophils, as indicated by inducible nitric oxide synthase 2 (iNOS2) staining, in the skin of *Foxp3<sup>Cre</sup>Mtor<sup>+fl</sup>* and *Foxp3<sup>Cre</sup>Mtor<sup>fl/fl</sup>* mice. Error bars show mean  $\pm$  s.e.m. \**P* < 0.05; ns, not significant; unpaired, two-tailed Student's *t*-test. Data are representative of three biological replicates per group (**b–d**) or are quantified from eight (**a**) biological replicates per group, compiled from four independent experiments (**a**).

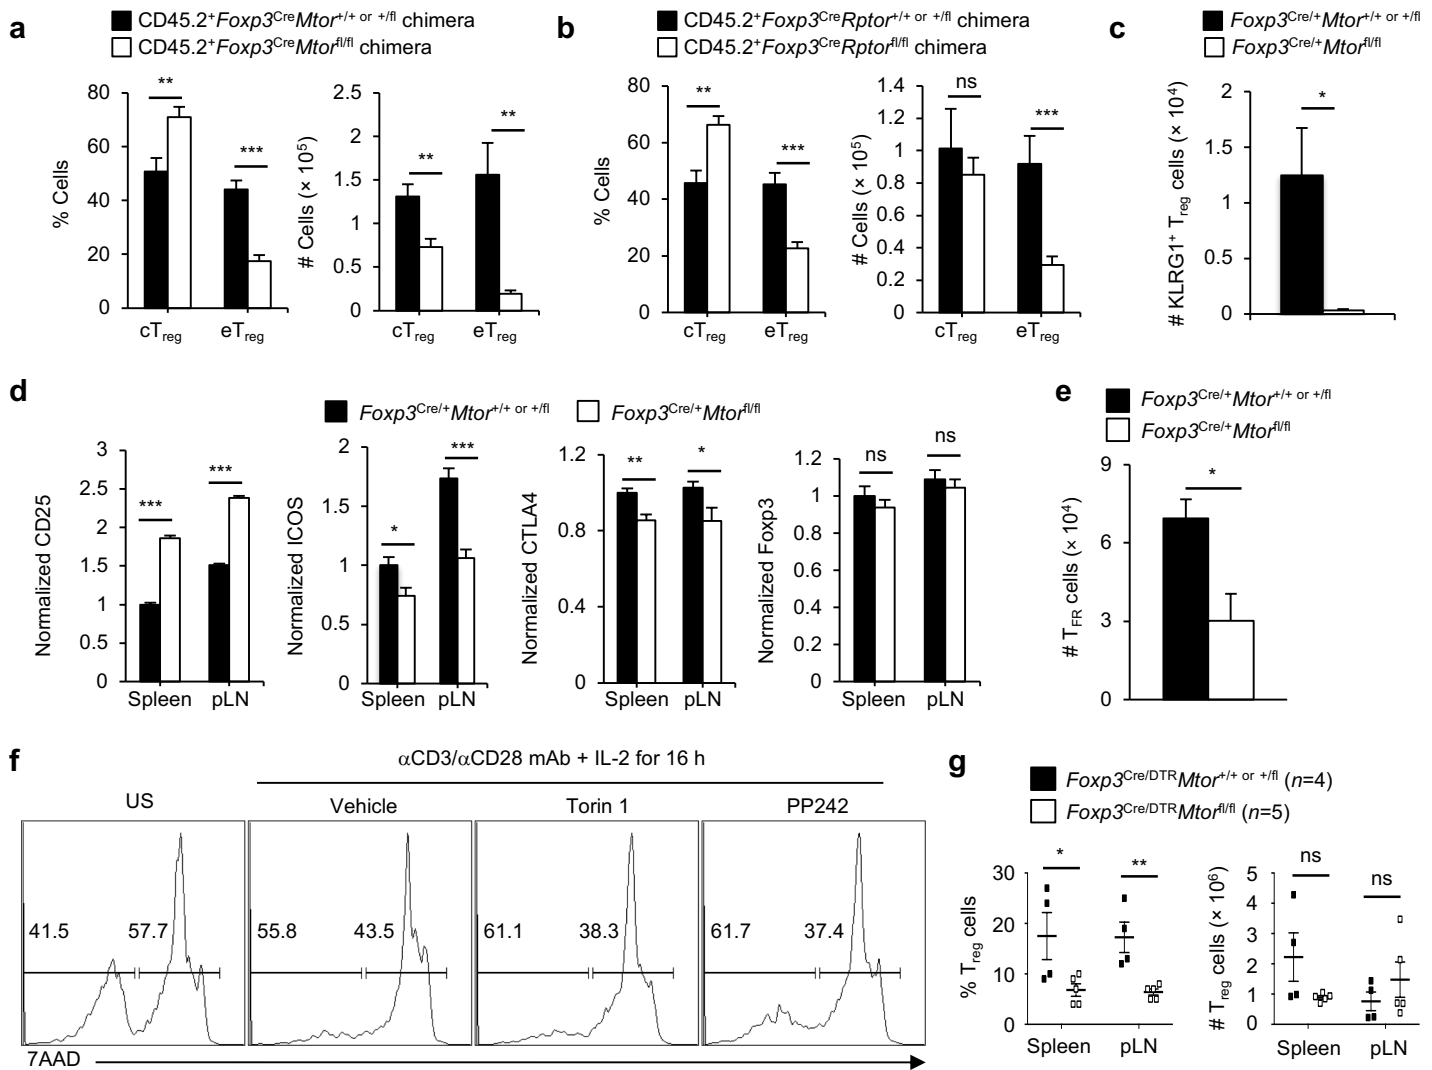

**Supplementary Fig. 3. mTOR supports activated T<sub>reg</sub> cell expansion through a survival-independent mechanism.** **a** Quantification of frequencies and cell numbers of mTOR-deficient CD4<sup>+</sup>Foxp3-YFP<sup>+</sup>CD44<sup>lo</sup>CD62L<sup>hi</sup> cT<sub>reg</sub> cells and CD4<sup>+</sup>Foxp3-YFP<sup>+</sup>CD44<sup>hi</sup>CD62L<sup>lo</sup> eT<sub>reg</sub> cells in mixed bone marrow chimeras. **b** Quantification of Raptor-deficient CD4<sup>+</sup>Foxp3-YFP<sup>+</sup>CD44<sup>lo</sup>CD62L<sup>hi</sup> cT<sub>reg</sub> cells and CD4<sup>+</sup>Foxp3-YFP<sup>+</sup>CD44<sup>hi</sup>CD62L<sup>lo</sup> eT<sub>reg</sub> cells in mixed bone marrow chimeras. **c** Quantification of the number of KLRG1<sup>+</sup> T<sub>reg</sub> cells in the spleen of *Foxp3<sup>Cre/+</sup>Mtor<sup>+/+</sup>* or *+/+* and *Foxp3<sup>Cre/+</sup>Mtor<sup>fl/fl</sup>* mosaic mice. **d** Quantification of CD25, ICOS, CTLA4, and Foxp3 expression in T<sub>reg</sub> cells in the spleen and peripheral lymph nodes (pLN) from *Foxp3<sup>Cre/+</sup>Mtor<sup>+/+</sup>* or *+/+* and *Foxp3<sup>Cre/+</sup>Mtor<sup>fl/fl</sup>* mosaic mice. **e** Quantification of the number of T<sub>FR</sub> cells (CD4<sup>+</sup>Foxp3-YFP<sup>+</sup>CXCR5<sup>+</sup>PD-1<sup>+</sup> T cells) in *Foxp3<sup>Cre/+</sup>Mtor<sup>+/+</sup>* or *+/+* and *Foxp3<sup>Cre/+</sup>Mtor<sup>fl/fl</sup>* mosaic mice. **f** cT<sub>reg</sub> cells were activated in vitro for 16 h with anti-CD3 and anti-CD28 antibodies in the presence of IL-2. 7AAD staining was used to distinguish between live (7AAD<sup>-</sup>) and dead (7AAD<sup>+</sup>) cells. **g** Quantification of the frequencies and numbers of Foxp3-YFP<sup>+</sup> T<sub>reg</sub> cells in the spleen and pLN of *Foxp3<sup>Cre/DTR</sup>Mtor<sup>+/+</sup>* or *+/+* or *Foxp3<sup>Cre/DTR</sup>Mtor<sup>fl/fl</sup>* mosaic mice following diphtheria toxin (DT) treatment. Error bars show mean ± s.e.m. \* *P* < 0.05; \*\* *P* < 0.01; \*\*\* *P* < 0.001; ns, not significant; unpaired, two-tailed Student's *t*-test. Data are representative of two independent experiments (f) or are quantified from twelve or thirteen (a, CD45.2<sup>+</sup>Foxp3<sup>Cre</sup>Mtor<sup>+/+</sup> or *+/+* chimera and CD45.2<sup>+</sup>Foxp3<sup>Cre</sup>Mtor<sup>fl/fl</sup> chimera, respectively), five or seven (b, CD45.2<sup>+</sup>Foxp3<sup>Cre</sup>Rptor<sup>+/+</sup> or *+/+* chimera and CD45.2<sup>+</sup>Foxp3<sup>Cre</sup>Rptor<sup>fl/fl</sup> chimera, respectively), eight (c; d, CD25, CTLA4, and Foxp3), nine (d, ICOS), six (e), or three or four (g, as indicated) biological replicates, compiled from seven (a), four (b; c; d, CD25, CTLA4, and Foxp3), five (d, ICOS), three (e), or two (g) independent experiments. Numbers indicate percentage of cells in gates.



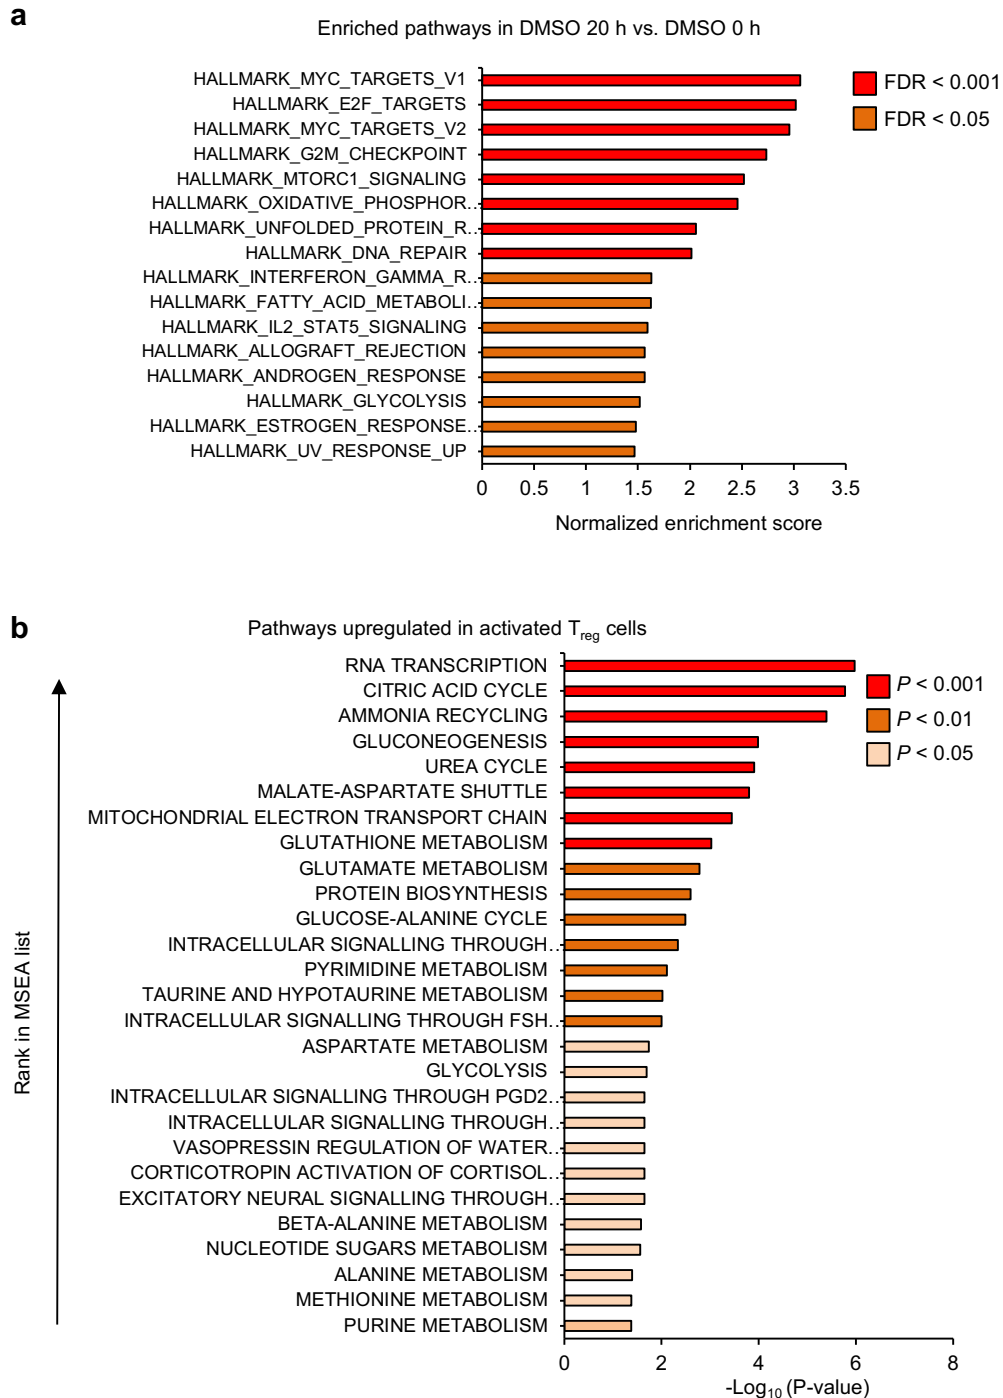

**Supplementary Fig. 4.** Characterization of mitochondrial metabolism in T<sub>reg</sub> cells. **a** GSEA identified Hallmark pathways enriched in cT<sub>reg</sub> cells activated for 20 h compared to unstimulated controls. **b** Metabolomics and metabolite set enriched analysis (MSEA) were used to identify various KEGG pathways upregulated in activated T<sub>reg</sub> cells vs. unstimulated T<sub>reg</sub> cells.

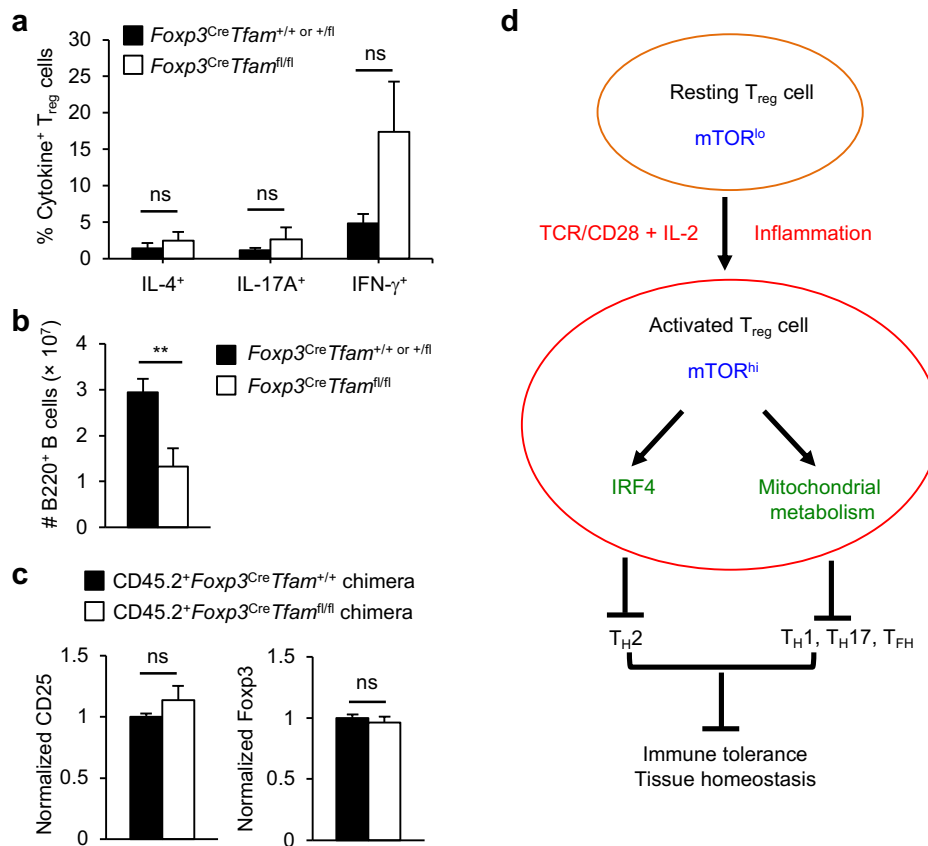

**Supplementary Fig. 5.** Characterization of T<sub>reg</sub> and B cell populations in *Foxp3<sup>Cre</sup>Tfam<sup>fl/fl</sup>* mice and model for mTOR-dependent coordination of IRF4 and mitochondrial metabolism in programming T<sub>reg</sub> cell function. **a** Quantification of IL-4-, IL-17A-, and IFN- $\gamma$ -producing CD4<sup>+</sup>Foxp3<sup>+</sup> T<sub>reg</sub> cells in *Foxp3<sup>Cre</sup>Tfam<sup>+/+</sup> or +/fl* and *Foxp3<sup>Cre</sup>Tfam<sup>fl/fl</sup>* mice. **b** Quantification of the numbers of B220<sup>+</sup> B cells in the spleen of *Foxp3<sup>Cre</sup>Tfam<sup>+/+</sup> or +/fl* and *Foxp3<sup>Cre</sup>Tfam<sup>fl/fl</sup>* mice. **c** Quantification of CD25 and Foxp3 expression in T<sub>reg</sub> cells from mixed bone marrow chimeras. Error bars show mean  $\pm$  s.e.m. \*\*  $P < 0.01$ ; ns, not significant; unpaired, two-tailed Student's *t*-test. Data are quantified from six (**a**, IL-4<sup>+</sup> cells), nine (**a**, IL-17A<sup>+</sup> and IFN- $\gamma$ <sup>+</sup> cells), ten (**b**), or nine or ten (**c**, CD45.2<sup>+</sup>*Foxp3<sup>Cre</sup>Tfam<sup>+/+</sup>* chimeras and CD45.2<sup>+</sup>*Foxp3<sup>Cre</sup>Tfam<sup>fl/fl</sup>* chimeras, respectively) biological replicates, compiled from six (**a**, IL-4<sup>+</sup> cells), nine (**a**, IL-17A<sup>+</sup> and IFN- $\gamma$ <sup>+</sup> cells), seven (**b**), or four (**c**) independent experiments. **d** In the periphery, TCR, co-stimulatory, IL-2, and inflammatory signals activate mTOR function in resting T<sub>reg</sub> cells to promote IRF4 expression and mitochondrial metabolism. These pathways coordinately control T<sub>reg</sub> cell activation and homeostasis. In turn, activated T<sub>reg</sub> cells maintain peripheral T cell tolerance and tissue homeostasis.

**Supplementary Table 1. GSEA of cT<sub>reg</sub> activated with mTOR inhibitors vs. DMSO control for 20 h**

| NAME                               | Torin 1 20 h vs. DMSO 20 h |           |           | PP242 20 h vs. DMSO 20 h |           |           |
|------------------------------------|----------------------------|-----------|-----------|--------------------------|-----------|-----------|
|                                    | NES                        | NOM p-val | FDR q-val | NES                      | NOM p-val | FDR q-val |
| HALLMARK_E2F_TARGETS               | -3.39                      | < 0.001   | < 0.001   | -3.31                    | < 0.001   | < 0.001   |
| HALLMARK_G2M_CHECKPOINT            | -3.27                      | < 0.001   | < 0.001   | -3.04                    | < 0.001   | < 0.001   |
| HALLMARK_MYC_TARGETS_V1            | -3.16                      | < 0.001   | < 0.001   | -3.08                    | < 0.001   | < 0.001   |
| HALLMARK_MTORC1_SIGNALING          | -2.89                      | < 0.001   | < 0.001   | -2.78                    | < 0.001   | < 0.001   |
| HALLMARK_OXIDATIVE_PHOSPHORYLATION | -2.79                      | < 0.001   | < 0.001   | -2.70                    | < 0.001   | < 0.001   |
| HALLMARK_MYC_TARGETS_V2            | -2.66                      | < 0.001   | < 0.001   | -2.87                    | < 0.001   | < 0.001   |
| HALLMARK_MITOTIC_SPINDLE           | -2.21                      | < 0.001   | < 0.001   | -2.16                    | < 0.001   | 1.56E-04  |
| HALLMARK_UNFOLDED_PROTEIN_RESPONSE | -2.20                      | < 0.001   | < 0.001   | -1.82                    | < 0.001   | 4.95E-04  |
| HALLMARK_DNA_REPAIR                | -2.12                      | < 0.001   | < 0.001   | -2.17                    | < 0.001   | 1.79E-04  |
| HALLMARK_INTERFERON_GAMMA_RESPONSE | -1.95                      | < 0.001   | 1.32E-04  | -1.63                    | < 0.001   | 6.90E-03  |
| HALLMARK_FATTY_ACID_METABOLISM     | -1.84                      | < 0.001   | 6.82E-04  | -2.05                    | < 0.001   | 1.25E-04  |
| HALLMARK_GLYCOLYSIS                | -1.81                      | < 0.001   | 9.61E-04  | -1.97                    | < 0.001   | 1.14E-04  |
| HALLMARK_ESTROGEN_RESPONSE_LATE    | -1.79                      | < 0.001   | 1.13E-03  | -1.75                    | < 0.001   | 1.29E-03  |
| HALLMARK_ADIPOGENESIS              | -1.75                      | < 0.001   | 1.88E-03  | -1.64                    | < 0.001   | 6.13E-03  |
| HALLMARK_UV_RESPONSE_UP            | -1.63                      | < 0.001   | 7.60E-03  | -1.71                    | < 0.001   | 2.24E-03  |
| HALLMARK_CHOLESTEROL_HOMEOSTASIS   | -1.62                      | 1.32E-02  | 8.21E-03  | -2.06                    | < 0.001   | 1.39E-04  |
| HALLMARK_SPERMATOGENESIS           | -1.58                      | < 0.001   | 1.28E-02  | -1.62                    | < 0.001   | 6.74E-03  |
| HALLMARK_XENOBIOTIC_METABOLISM     | -1.53                      | < 0.001   | 1.75E-02  | -1.48                    | 2.99E-03  | 2.18E-02  |
| HALLMARK_ALLOGRAFT_REJECTION       | -1.51                      | 5.21E-03  | 2.05E-02  | -1.58                    | < 0.001   | 9.49E-03  |
| HALLMARK_PI3K_AKT_MTOR_SIGNALING   | -1.41                      | 2.40E-02  | 4.64E-02  | -1.40                    | 3.48E-02  | 4.19E-02  |
